# Supplementary material
Source: publisher figshare collection journal article supplement (https://acs.figshare.com/ndownloader/files/3871405)
Supplement: Supplementary file 1 [file 3871405]

---

## Supplementary Materials

### for

# Oxygen Vacancy Enhanced Photocatalytic Activity of Pervoskite SrTiO<sub>3</sub>

*Huaqiao Tan<sup>†</sup>, Zhao Zhao<sup>†‡</sup>, Wan-bin Zhu<sup>§</sup>, Eric N. Coker<sup>''</sup>, Binsong Li<sup>''</sup>, Min Zheng<sup>†</sup>,  
Weixing Yu<sup>§</sup>, Hongyou Fan<sup>''<sup>⊥</sup></sup>, Zaicheng Sun<sup>†\*</sup>*

<sup>†</sup>State Key Laboratory of Luminescence and Applications, Changchun Institute of Optics, Fine Mechanics and Physics, Chinese Academy of Sciences, 3888 East Nanhu Road, Changchun 130033, People's Republic of China

<sup>‡</sup>University of Chinese Academy of Sciences, Beijing 100000, P. R. China

<sup>§</sup>State Key Laboratory of Applied Optics, Changchun Institute of Optics, Fine Mechanics and Physics, Chinese Academy of Sciences, Changchun 130033, China

<sup>''</sup>Advanced Materials Laboratory, Sandia National Laboratories, PO Box 5800 MS1349, Albuquerque NM 87185-1349, USA.

<sup>⊥</sup>Center for Micro- Engineering and Materials, Department of Chemical and Nuclear Engineering, University of New Mexico, Albuquerque, NM 87106, United State.

[\\*sunzc@ciomp.ac.cn](mailto:sunzc@ciomp.ac.cn) (ZS)

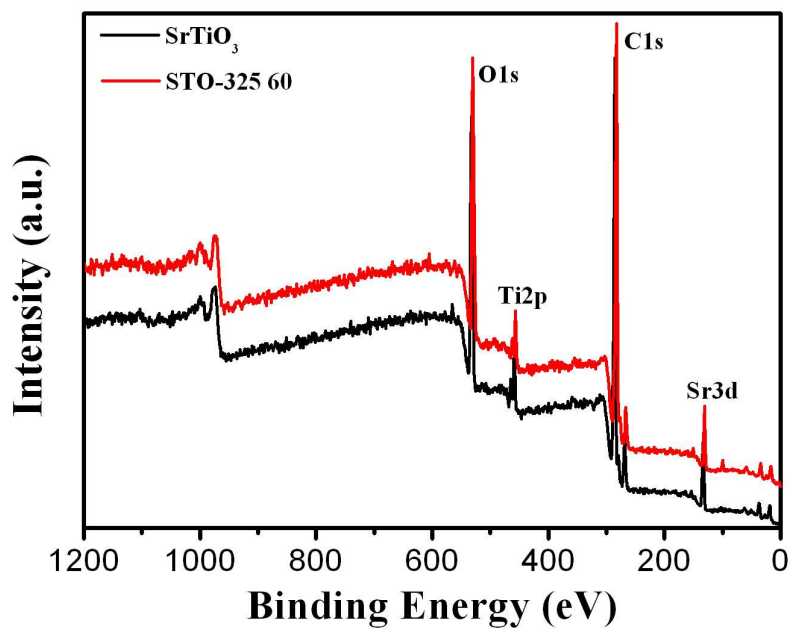

**Figure S1.** Full XPS survey of pristine SrTiO<sub>3</sub> and STO-325 60.

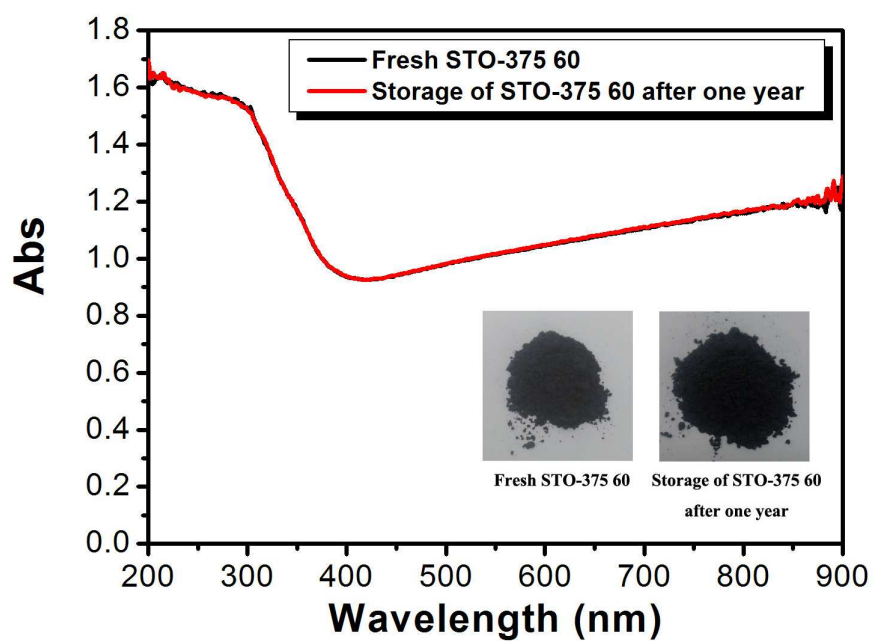

**Figure S2.** (a) The diffuse reflectance UV-Vis spectra of STO-375 60 (fresh and stored for a year); (b) optical image of STO-375 60 (fresh and stored for a year).

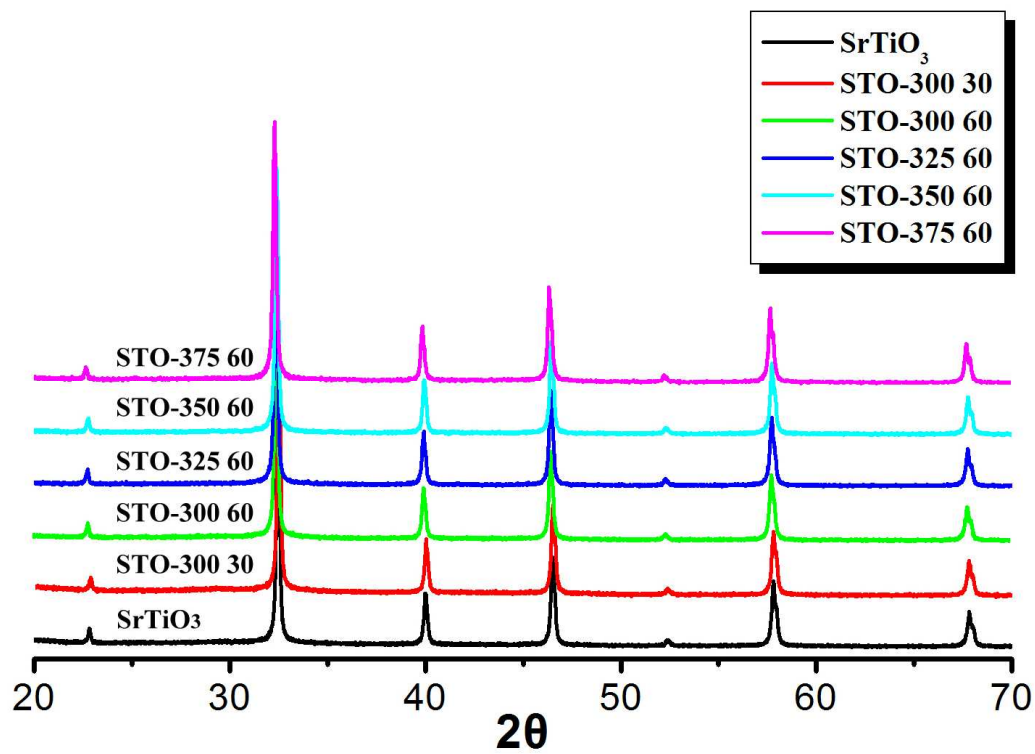

Figure S3. XRD pattern of pristine  $\text{SrTiO}_3$  and STO samples.

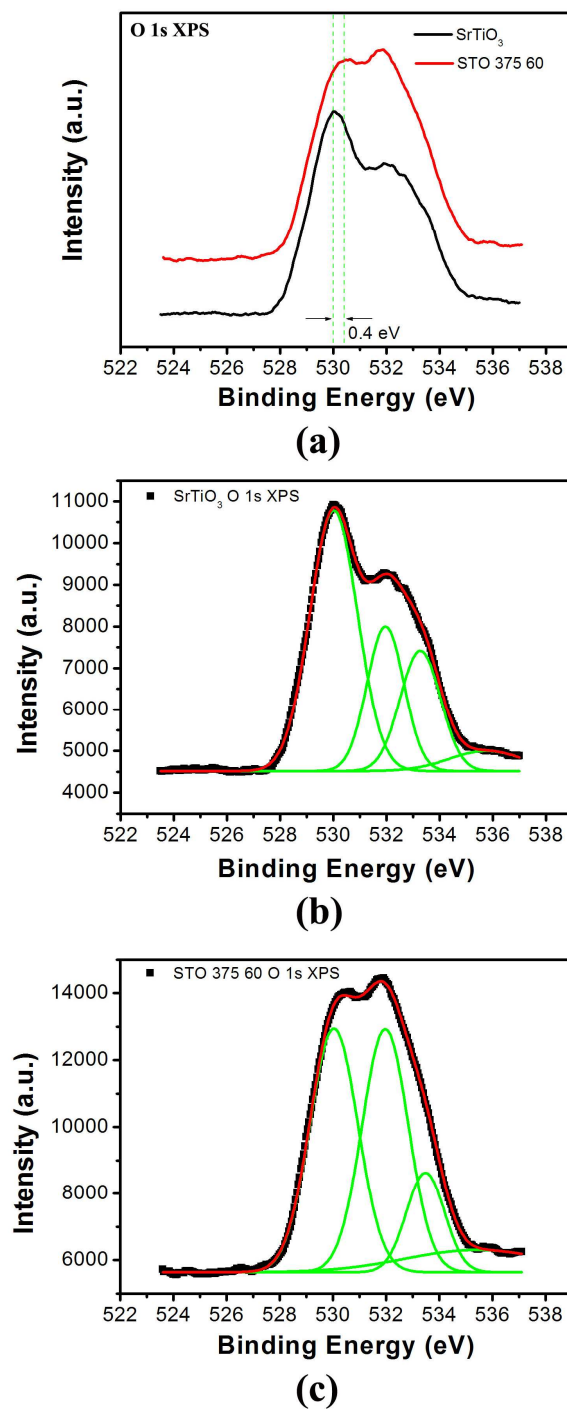

**Figure S4.** (a) O 1s XPS of pristine SrTiO<sub>3</sub> and STO-375 60; (b) the O 1s spectra of pristine SrTiO<sub>3</sub> can be described as the superposition of three peaks by Gaussian distribution, located around 530.0 eV, 531.9 eV and 533.4 eV, respectively; (c) the O 1s spectra of STO-375 60 can be described as the superposition of three peaks by Gaussian distribution, located around 530.0 eV, 531.9 eV and 533.4 eV, respectively.

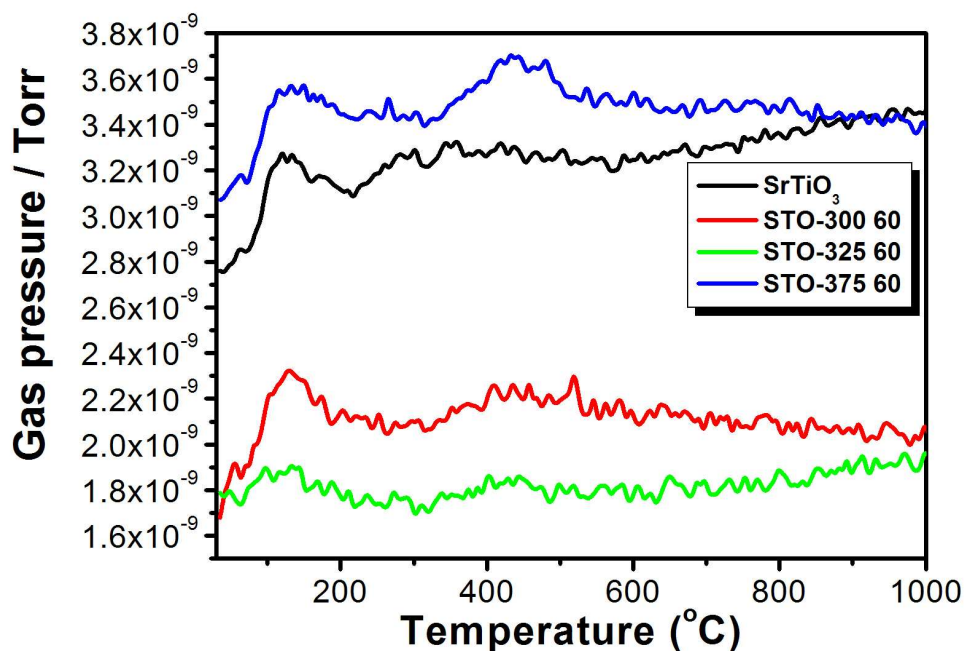

**Figure S5.** The  $\text{H}_2\text{O}$  mass spectra monitored the gas coming out from samples during TGA measurement of pristine  $\text{SrTiO}_3$  and STO samples.

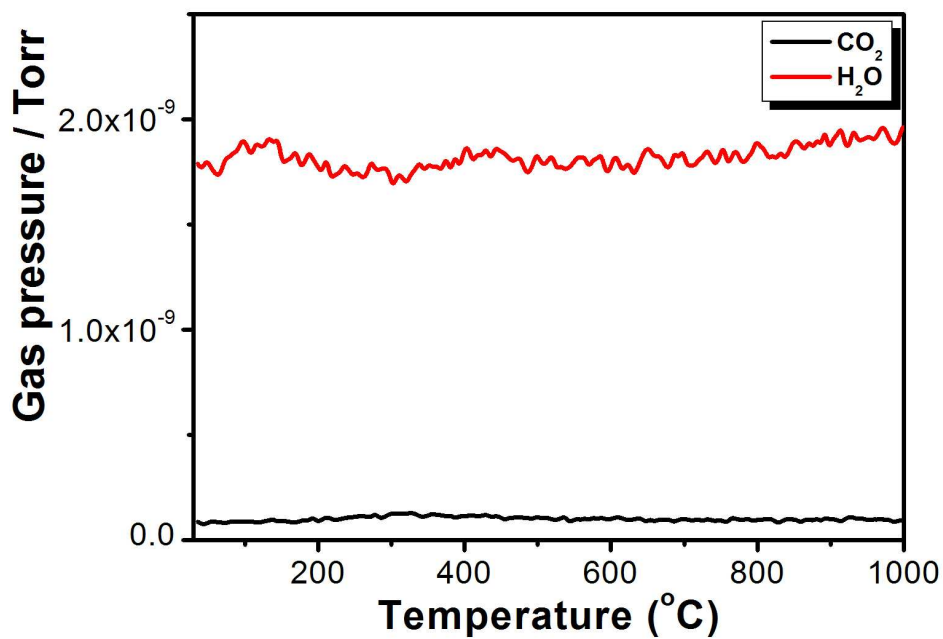

**Figure S6.** The  $\text{CO}_2$  and  $\text{H}_2\text{O}$  mass spectra monitored the gas coming out from samples during TGA measurement of STO-325 60.
